# Supplementary material
Source: PubMed Central journal article supplement (PMC3356645)
Supplement: 1105034109_pnas.201105034SI.pdf [file 1105034109_pnas.201105034SI.pdf]

# Supporting Information

Bielen et al. 10.1073/pnas.1105034109

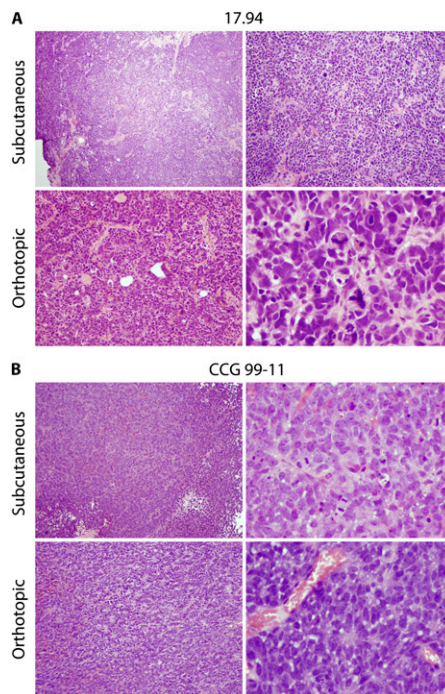

**Fig. S1.** Comparison of s.c. and orthotopic Wilms tumor models. (A) In 17.94 cells s.c., large hyperchromatic nuclei and multipolar mitotic figures are seen. No tubular structures are observed. Orthotopically, the tumor fills the renal sinus and invades the renal parenchyma. There are large, hyperchromatic nuclei and multipolar mitotic figures. Primitive tubular structures and cells with epithelial morphology can be seen, consistent with anaplastic Wilms tumor. (B) In CCG 99–11 cells s.c., the cells are largely monomorphic with brisk mitotic activity and large areas of necrosis. Orthotopically, the tumor cells are rounded or elongated, with multiple rosette-like structures easily detected. The tumor histology is consistent with blastemal Wilms tumor.
